# Supplementary material
Source: Springer Nature journal article supplement (https://www.springermedizin.de/resource/supplementary/12974_2011_410_MOESM6_ESM.pdf/9601234)
Supplement: MOESM6 [file 9601234]

**A****Cnr1<sup>+/+</sup>**

ipsilateral

contralateral

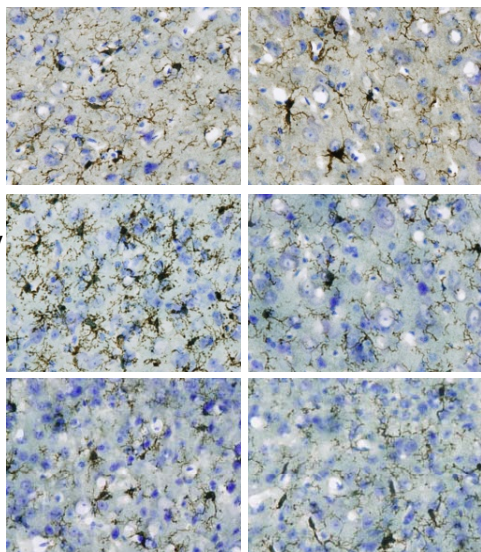**B****Cnr1<sup>-/-</sup>**

ipsilateral

contralateral

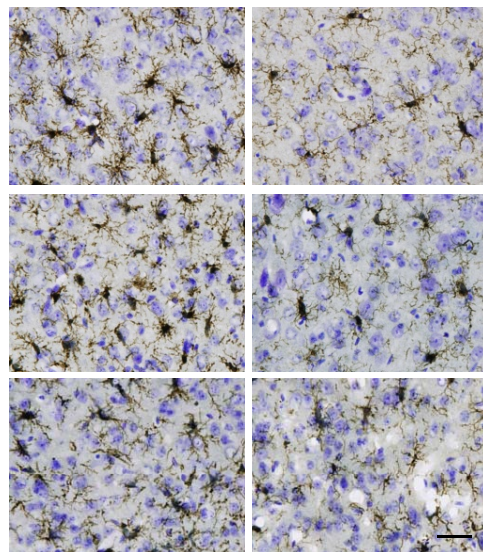**C**

|               | Cnr1 <sup>+/+</sup>          |                | Cnr1 <sup>-/-</sup>          |                |
|---------------|------------------------------|----------------|------------------------------|----------------|
|               | ipsilateral                  | contralateral  | ipsilateral                  | contralateral  |
| Rostral level | 13,773 ± 0,592 <sup>++</sup> | 12,013 ± 0,489 | 20,028 ± 1,257 <sup>##</sup> | 16,956 ± 0,913 |
| Medial level  | 25,277 ± 1,403 <sup>**</sup> | 13,223 ± 0,788 | 21,341 ± 0,958 <sup>##</sup> | 17,151 ± 1,007 |
| Caudal level  | 16,621 ± 1,465 <sup>++</sup> | 15,909 ± 2,327 | 19,657 ± 1,120 <sup>#</sup>  | 16,320 ± 0,796 |
